# Supplementary material
Source: PubMed Central journal article supplement (PMC9440547)
Supplement: NIHMS1832114-supplement-Suppl_Info.pdf [file NIHMS1832114-supplement-Suppl_Info.pdf]

## **Supporting Information**

### **In Vivo Imaging of Allografted Glial-Restricted Progenitor Cell Survival and Hydrogel Scaffold Biodegradation**

*Shreyas Kuddannaya<sup>†,‡</sup>, Wei Zhu<sup>†,‡</sup>, Chengyan Chu<sup>†,‡</sup>, Anirudha Singh<sup>§,¥</sup>,  
Piotr Walczak<sup>®</sup>, Jeff W.M. Bulte<sup>\* †, ‡, ¥, #, ø</sup>*

†The Russell H. Morgan Department of Radiology and Radiological Science, Division of MR Research, The Johns Hopkins School of Medicine, Baltimore, MD 21205, United States. ‡Cellular Imaging Section and Vascular Biology Program, Institute for Cell Engineering, The Johns Hopkins School of Medicine, Baltimore, MD 21205, United States. §Department of Urology, the James Buchanan Brady Urological Institute, The Johns Hopkins School of Medicine, Baltimore, MD 21287, United States. ¥Department of Chemical & Biomolecular Engineering, The Johns Hopkins School of Medicine, Baltimore, MD 21205, United States. #Department of Biomedical Engineering, The Johns Hopkins University School of Medicine, Baltimore, MD 21205, United States. øDepartment of Oncology, The Johns Hopkins University School of Medicine, Baltimore, MD 21205, United States. ®Center for Advanced Imaging Research, Department of Diagnostic Radiology and Nuclear Medicine, University of Maryland, Baltimore, MD, United States.

\*Corresponding Author. E-mail: [jwmbulte@mri.jhu.edu](mailto:jwmbulte@mri.jhu.edu)

**Table S1:** Composite make-up of hydrogel formulations.

| Hydrogel formulations | Component dilutions ( $\mu\text{l}$ ) from 20 mg/ml stock (s) in sterile water (w) to prepare 100 $\mu\text{l}$ of hydrogel |                                |                                |
|-----------------------|-----------------------------------------------------------------------------------------------------------------------------|--------------------------------|--------------------------------|
|                       | HA-S<br>(weight fraction=0.4)                                                                                               | Gel-S<br>(weight fraction=0.4) | PEGDA<br>(weight fraction=0.2) |
| 20 mg/ml (2.0 %)      | 40 (s)                                                                                                                      | 40 (s)                         | 20 (s)                         |
| 15 mg/ml (1.5 %)      | 30 (s)+10 (w)                                                                                                               | 30 (s)+10 (w)                  | 15 (s)+5 (w)                   |
| 10 mg/ml (1.0 %)      | 20 (s)+20 (w)                                                                                                               | 20 (s)+20 (w)                  | 10 (s)+10 (w)                  |
| 5 mg/ml (0.5 %)       | 10 (s)+30 (w)                                                                                                               | 10 (s)+30 (w)                  | 5 (s)+15 (w)                   |

The mesh sizes of the composite hydrogels were calculated using a Flory-Rehner equation with a swelling (volume fraction) in 1x PBS, HA specific volume= 0.8137, MW of macromer (Mn) =300 kDa, polymer solvent interaction parameter ( $\chi$ ) = 0.473, molar volume of solvent ( $V_1$ ) =18 mol/cm<sup>3</sup>, and a specific volume (v)=0.8137 mL/g. The volume fractions of the gel in relaxed and swollen state ( $v_{2,r}$ ) and ( $v_{2,s}$ ) were calculated first from the swelling weight fractions and the molecular weight between crosslinks (Mc) was estimated as follows:

$$\frac{1}{M_c} = \frac{2}{M_n} - \frac{v/V_1 [\ln(1 - v_{2,s}) + (v_{2,s}) + \chi(v_{2,s})]}{v_{2,r} \left[ \left( \frac{v_{2,s}}{v_{2,r}} \right)^{\frac{1}{3}} - \frac{v_{2,s}}{2v_{2,r}} \right]}$$

The mesh size ( $\xi$ , in nm) calculation based on Flory-Rehner equation was adapted from Bryant et al.<sup>1</sup> as:

$$\xi = 0.1743(v_{2,s})^{\left(-\frac{1}{3}\right)}. (M_c)^{1/2}$$

**Table S2:** Hydrogel mesh sizes as calculated from swelling data.

| Hydrogel formulations | Mesh size (nm)   |
|-----------------------|------------------|
| 20 mg/ml (2.0 %)      | 24.67 $\pm$ 3.1  |
| 15 mg/ml (1.5 %)      | 59.11 $\pm$ 2.9  |
| 10 mg/ml (1.0 %)      | 81.82 $\pm$ 3.8  |
| 5 mg/ml (0.5 %)       | 126.45 $\pm$ 4.6 |

**Table S3:** Antibodies used for immunohistological characterization.

| <b>Antibodies</b> | <b>Company</b> | <b>Cat. #</b> | <b>Source</b> | <b>Dilution</b> |
|-------------------|----------------|---------------|---------------|-----------------|
| A2B5              | Millipore      | MAB312        | Mouse         | 1:500           |
| GFAP              | Dako           | Z0334         | Rabbit        | 1:1000          |
| Ki67              | Abcam          | ab15580       | Rabbit        | 1:200           |
| NG2               | Abcam          | ab129051      | Rabbit        | 1:500           |
| Olig1             | ThermoFisher   | PA5-21613     | Rabbit        | 1:200           |
| Olig2             | Millipore      | AB9610        | Rabbit        | 1:500           |
| PGDF-B            | Abcam          | ab23914       | Rabbit        | 1:300           |
| O4                | Millipore      | MAB345        | Mouse         | 1:200           |
| MBP               | Millipore      | AB9348        | Chicken       | 1:100           |
| AF-594 anti-Rb    | ThermoFisher   | A-11037       | Goat          | 1:1000          |
| AF-594 anti-Ch    | ThermoFisher   | A-11042       | Goat          | 1:1000          |
| AF-647 anti-Ms    | ThermoFisher   | A-21203       | Donkey        | 1:1000          |

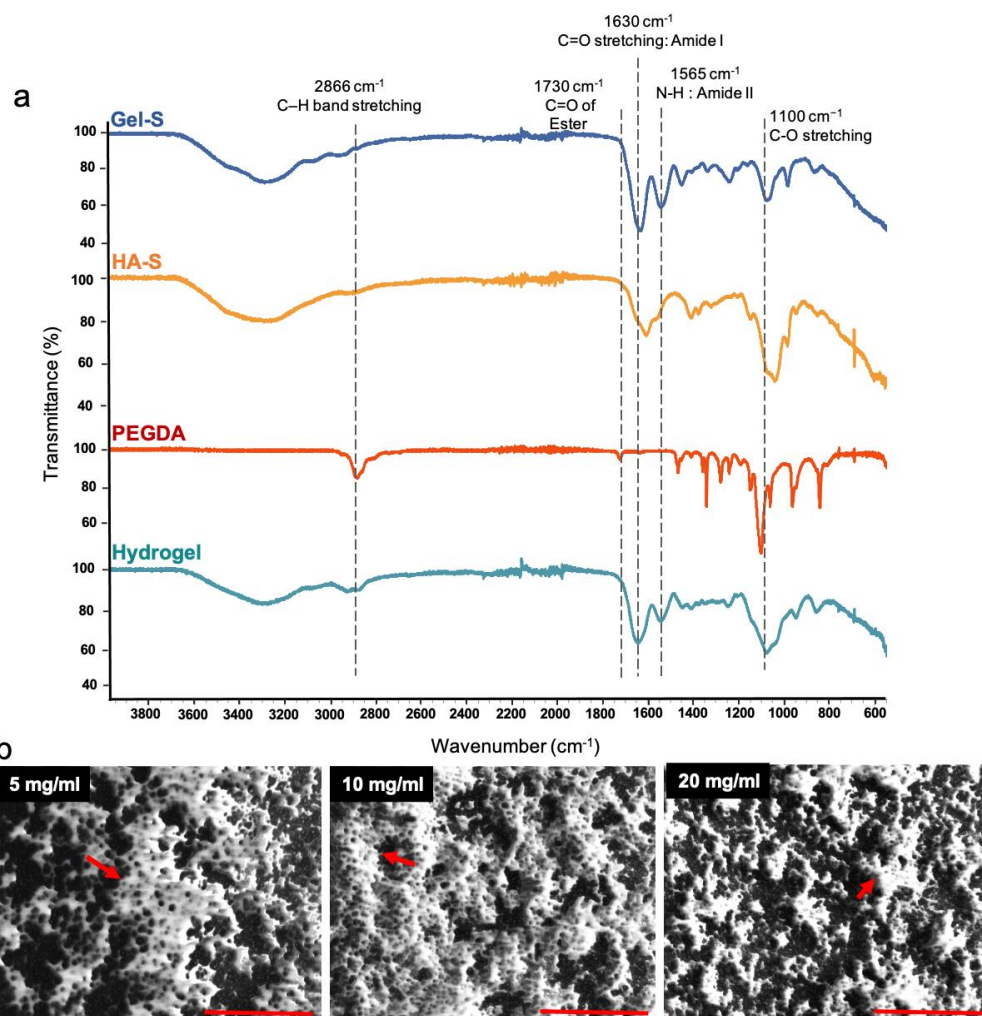

**Figure S1:** (a) FTIR spectra of hydrogel precursors and crosslinked hydrogel. (b) SEM micrographs of crosslinked 5, 10 and 20 mg/ml hydrogels. Red arrows point to honeycomb-like porous regions. Scale bar = 10  $\mu\text{m}$ .

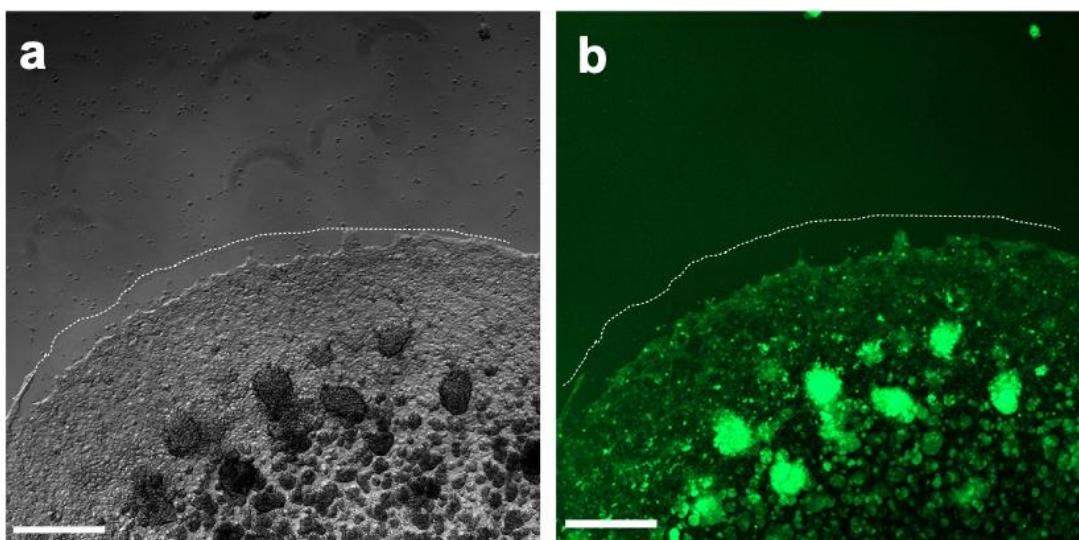

**Figure S2:** Morphology of scaffolded mGRPs in 10 mg/ml composite gels at day 14. (a) Phase contrast, (b) GFP fluorescence. Dotted line indicates hydrogel boundary. Scale bar=200  $\mu$ m

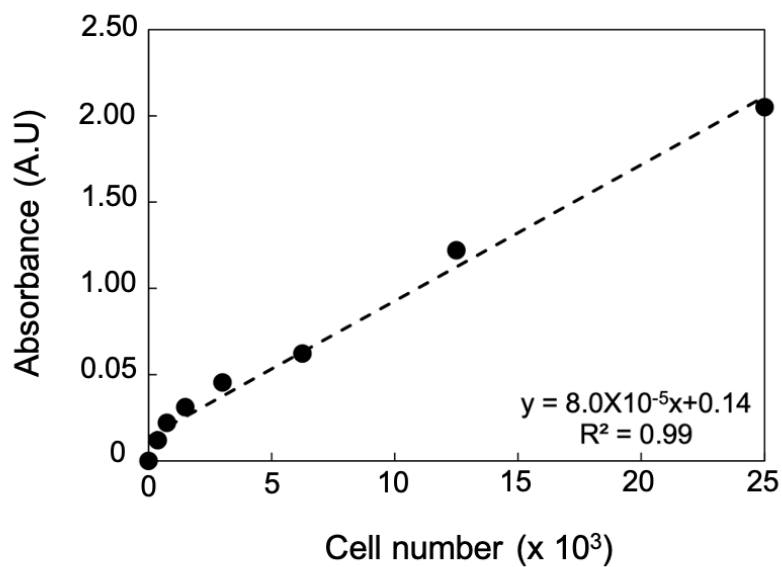

**Figure S3:** Calibration curve of absorbance vs. mGRP cell number for the CCK-8 proliferation assay.

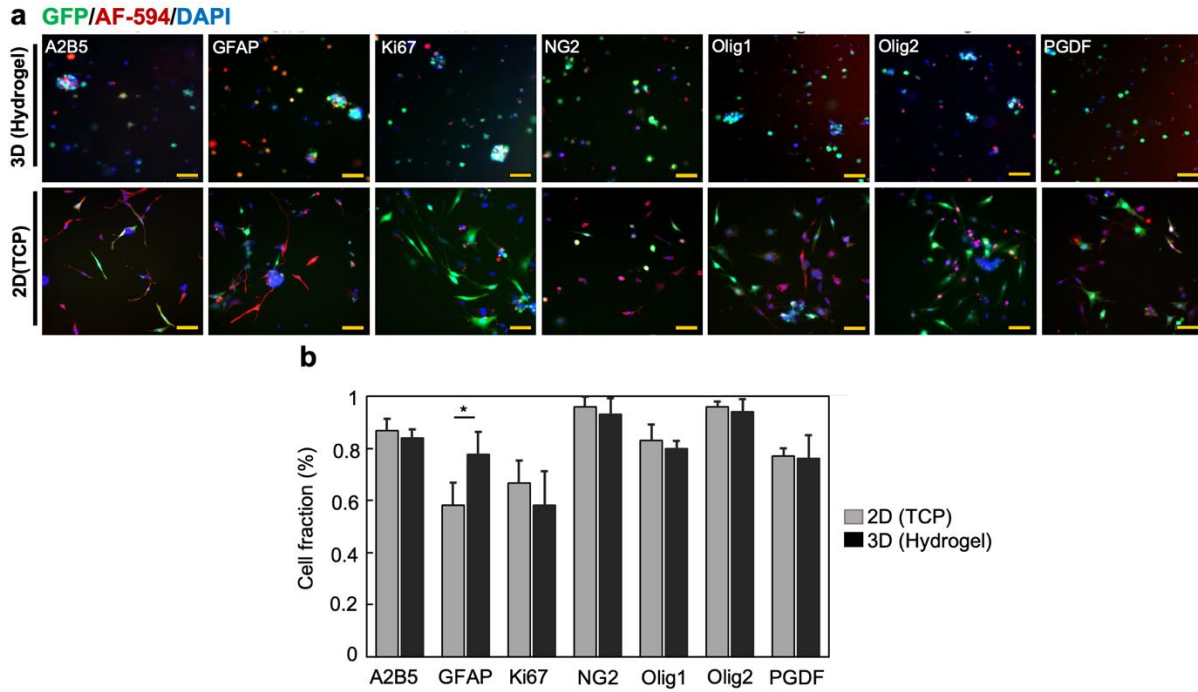

**Figure S4:** (a) Immunocytochemistry of GFP<sup>+</sup> mGRPs (day 4, green) grown either as 3D cultures (10 mg/ml hydrogel) or as plate surface 2D cultures showing expression of GRP phenotype markers (red). Nuclei are counterstained with DAPI. TCP=tissue culture plate. Scalebar = 100  $\mu$ m. (b) Quantification of cells expressing phenotypic markers. \* $p < 0.05$  (n=3).

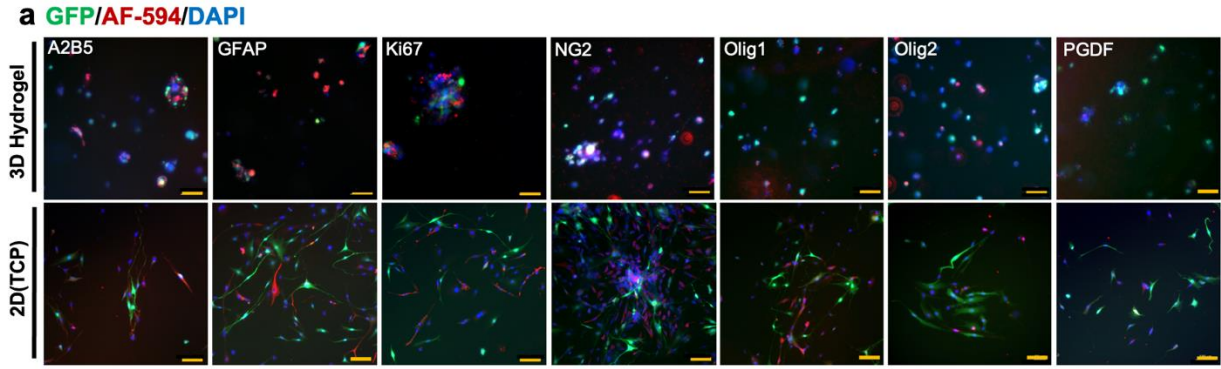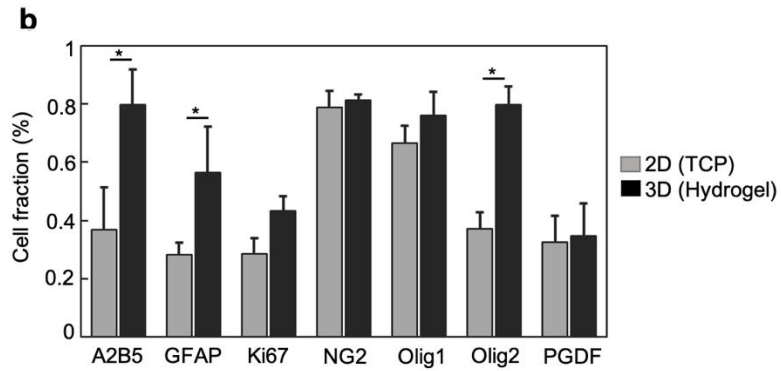

**Figure S5:** (a) Immunocytochemistry of GFP<sup>+</sup> mGRPs (day 16, green) grown either as 3D cultures (10 mg/ml hydrogel) or as plate surface 2D cultures showing the expression of GRP phenotype markers (red) in both single cells and 3D cell cultures. Nuclei are counterstained with DAPI (blue). TCP=tissue culture plate. Scale bars=100  $\mu$ m. (b) Quantification of cells expressing phenotypic markers. \* $p < 0.05$  (n=3).

**GFP/AF-594/DAPI**

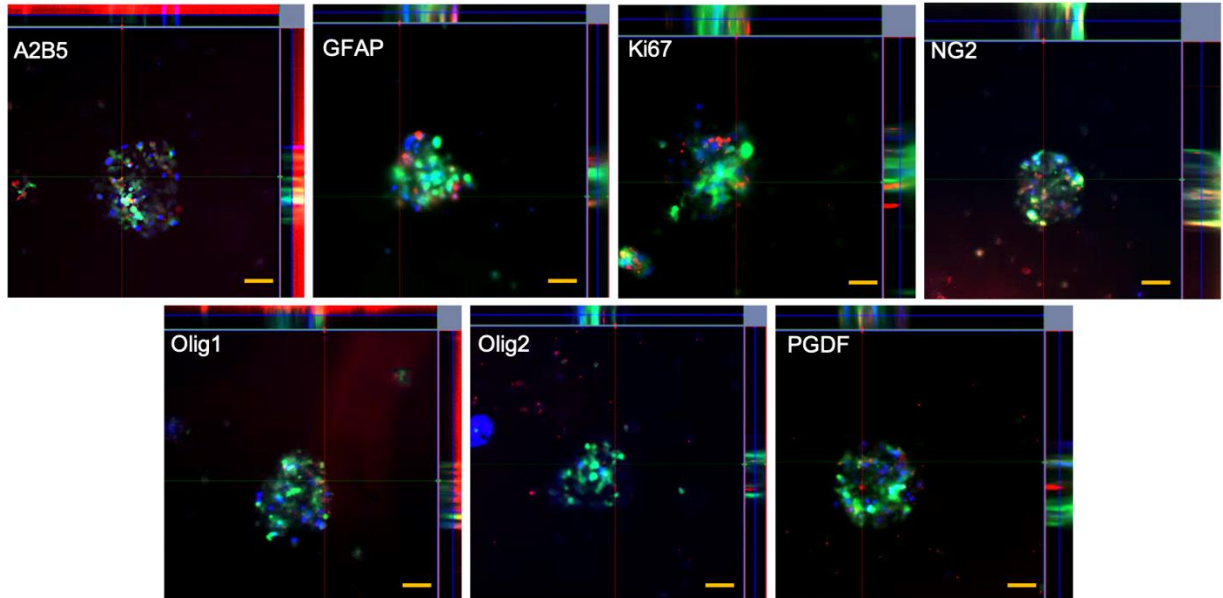

**Figure S6:** Immunocytochemistry of mGRP spheres (day 16, green) grown as 3D cultures (10 mg/ml hydrogel) showing the expression of GRP phenotype markers (red). Nuclei are counterstained with DAPI (blue). Scale bar=50 μm.



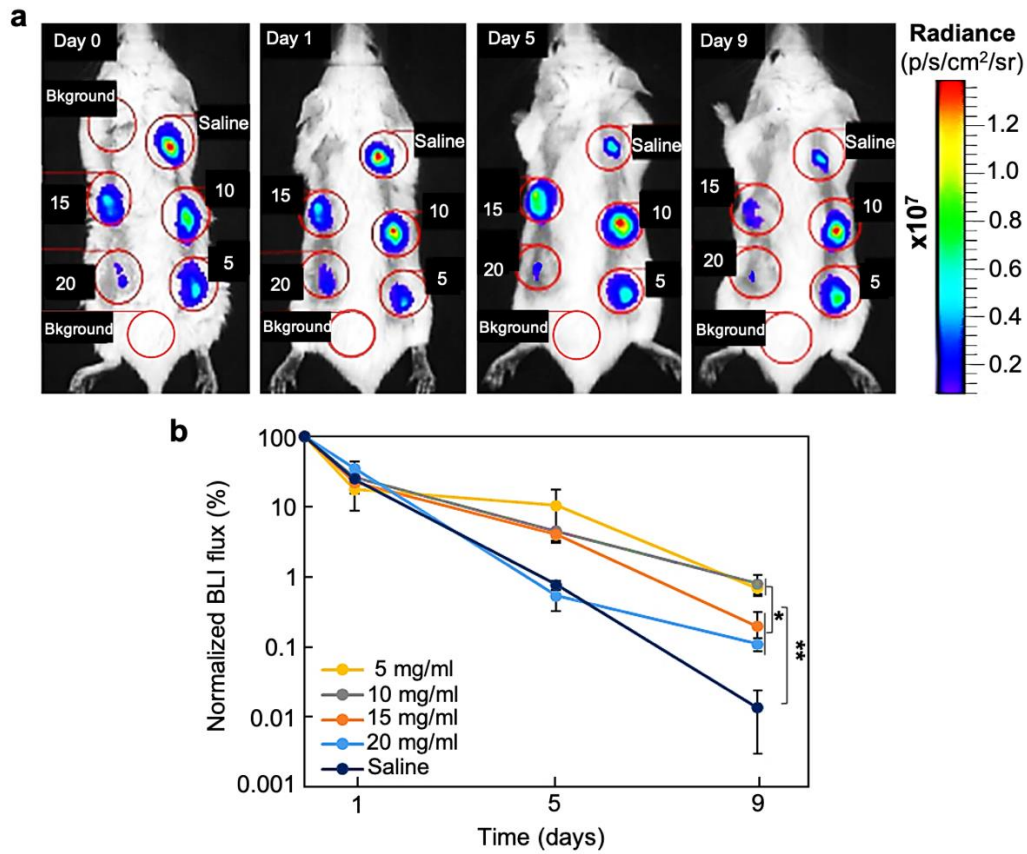

**Figure S7: S.c. transplanted mGRP survival:** (a) Representative in vivo BL images and (b) signal quantification of allogeneic mGRPs scaffolded in various hydrogel formulations or saline transplanted s.c. in immunocompetent Balb/C mice (n=4). Values represent different composite hydrogel densities expressed as mg/ml. Signal was normalized to the day of transplantation (day 0). \*p<0.05 between scaffolded cell groups and \*\*p<0.01 between scaffolded cell groups and saline group at day 9.

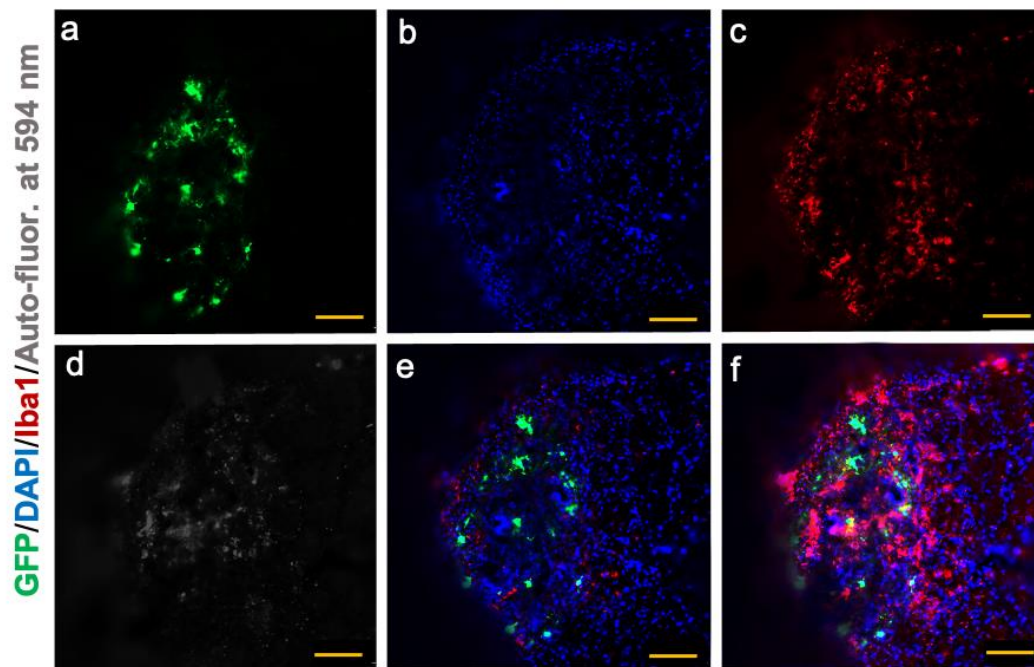

**Figure S8:** Immunohistology of (a) GFP<sup>+</sup> mGRP graft (green) stained with (b) DAPI (nuclear counterstain, blue) and (c) anti-Iba-1 (red) showing (d) autofluorescence from secondary antibody at 594 nm and (e, f) merged images without (e) and with (f) 594 nm autofluorescence. Scale bar=100  $\mu$ m.

## Reference

- 1) Bryant, S. J.; Anseth, K. S. Hydrogel Properties Influence ECM Production by Chondrocytes Photoencapsulated in Poly(ethyleneGlycol) Hydrogels. *J. Biomed. Mater. Res.* **2002**, 59, 63–72
